# Supplementary material
Source: Research Square preprint supplement (doi:10.21203/rs.3.rs-9369843/v1)

Figure7 Cloning of TaAP2-34 gene in Wheat


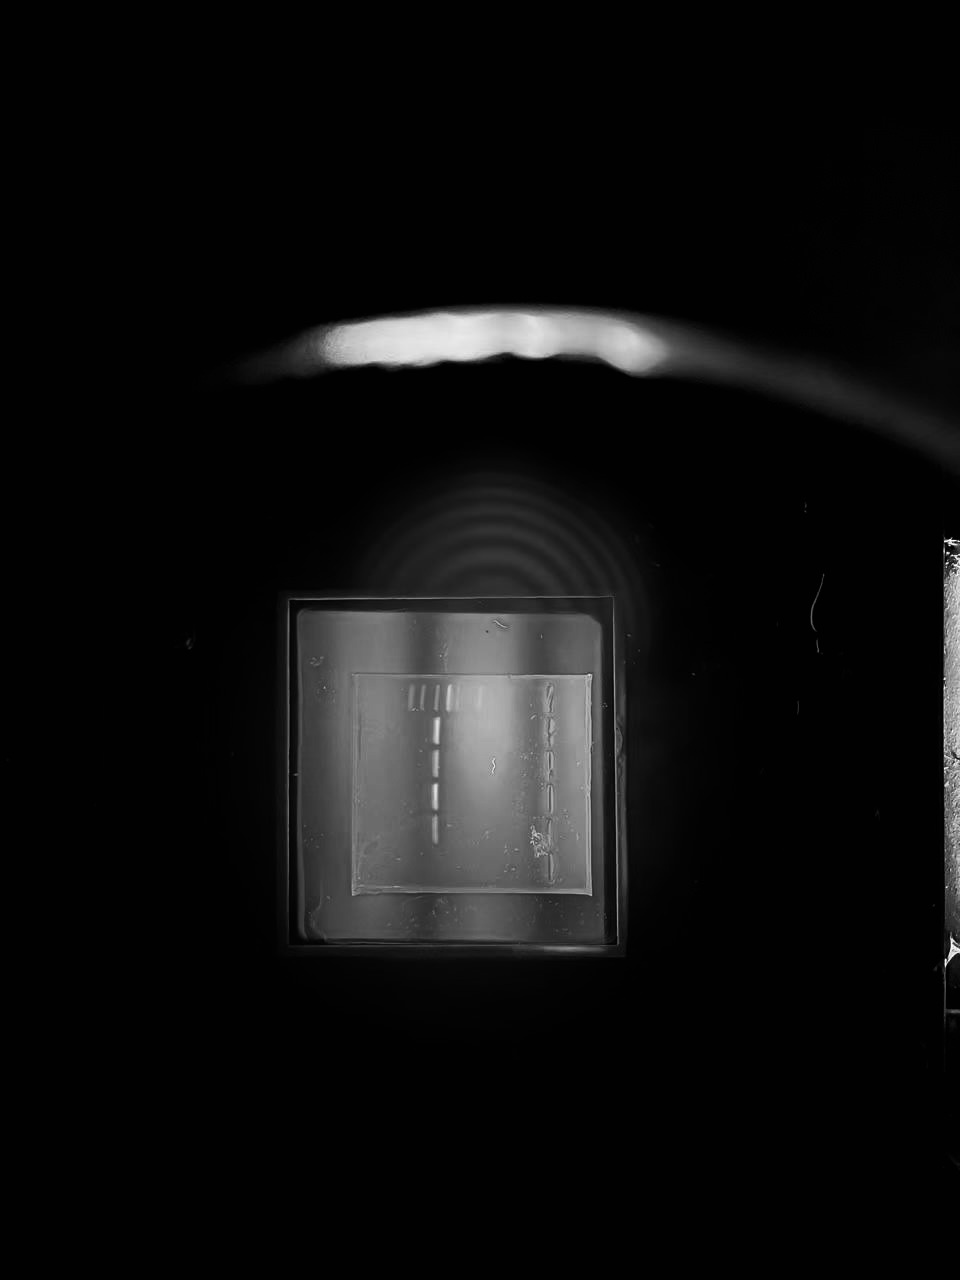


Figure8 Amplification results of bacterial liquid of TaAP2-34 gene cloning vector


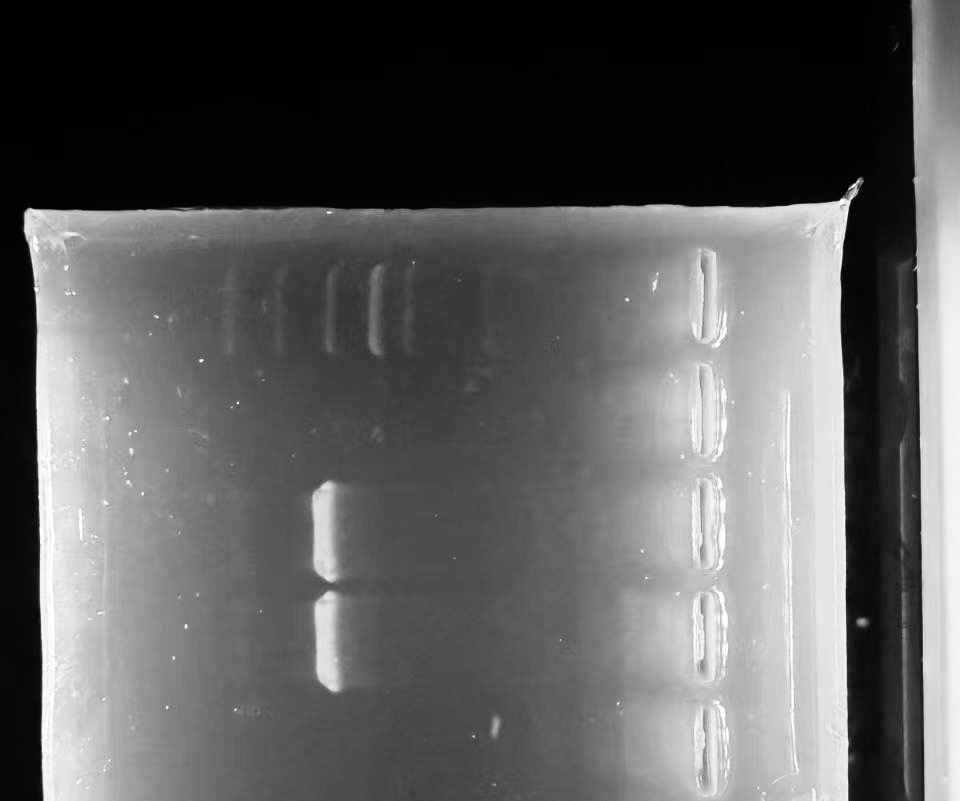


Figure12 Amplification results of bacterial solution of TaAP2-34 gene cloning vector


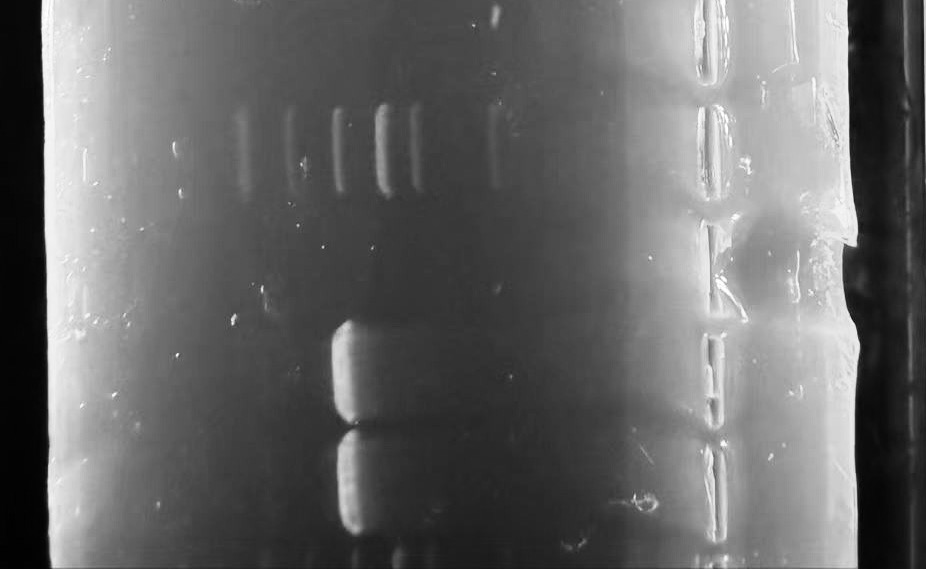


The original image of Figure 7 before color adjustment.


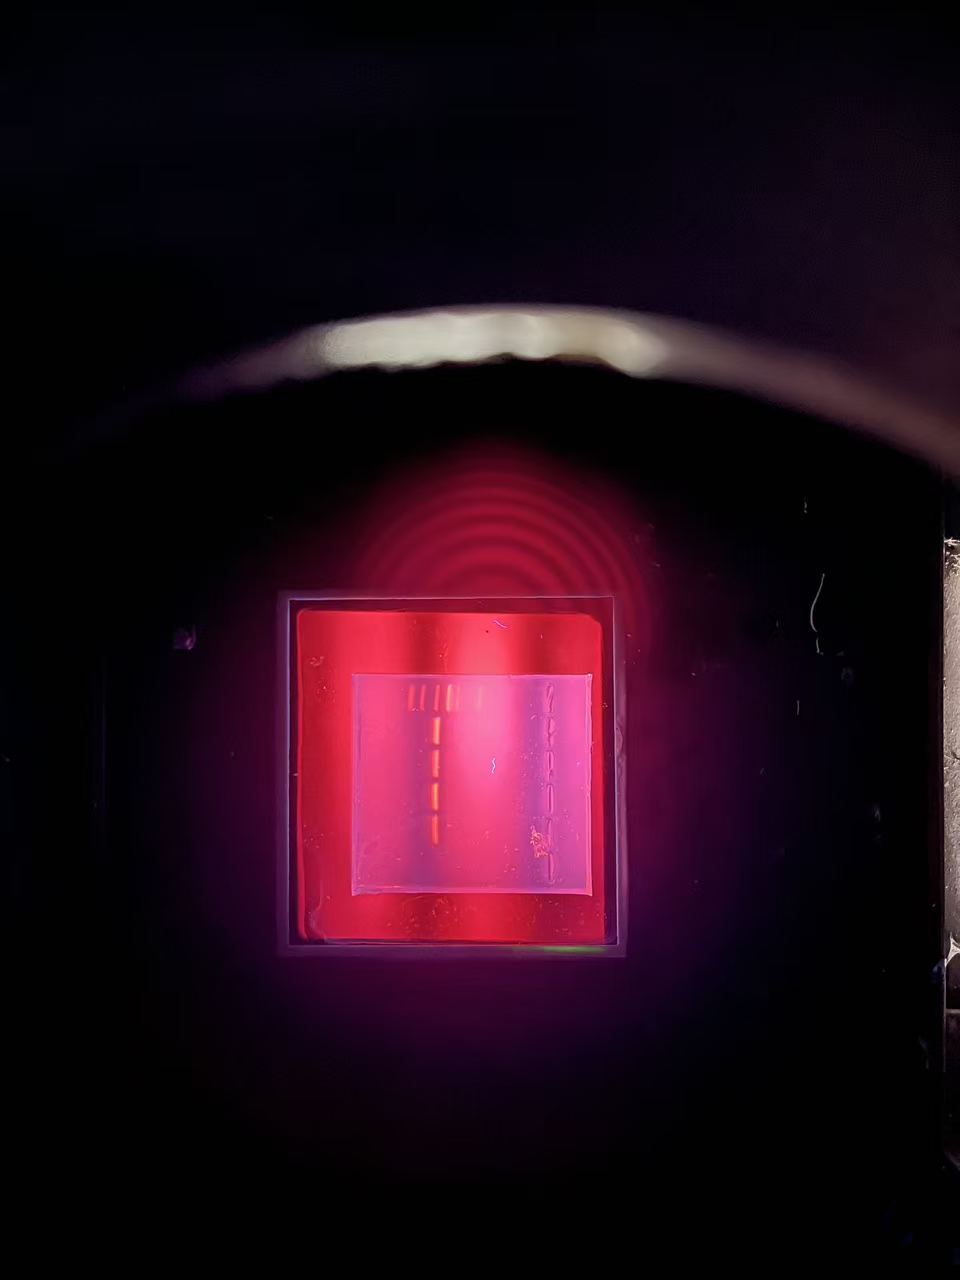


The original images of Figure 8 and Figure 12 are on the same picture, and these are before color adjustment.


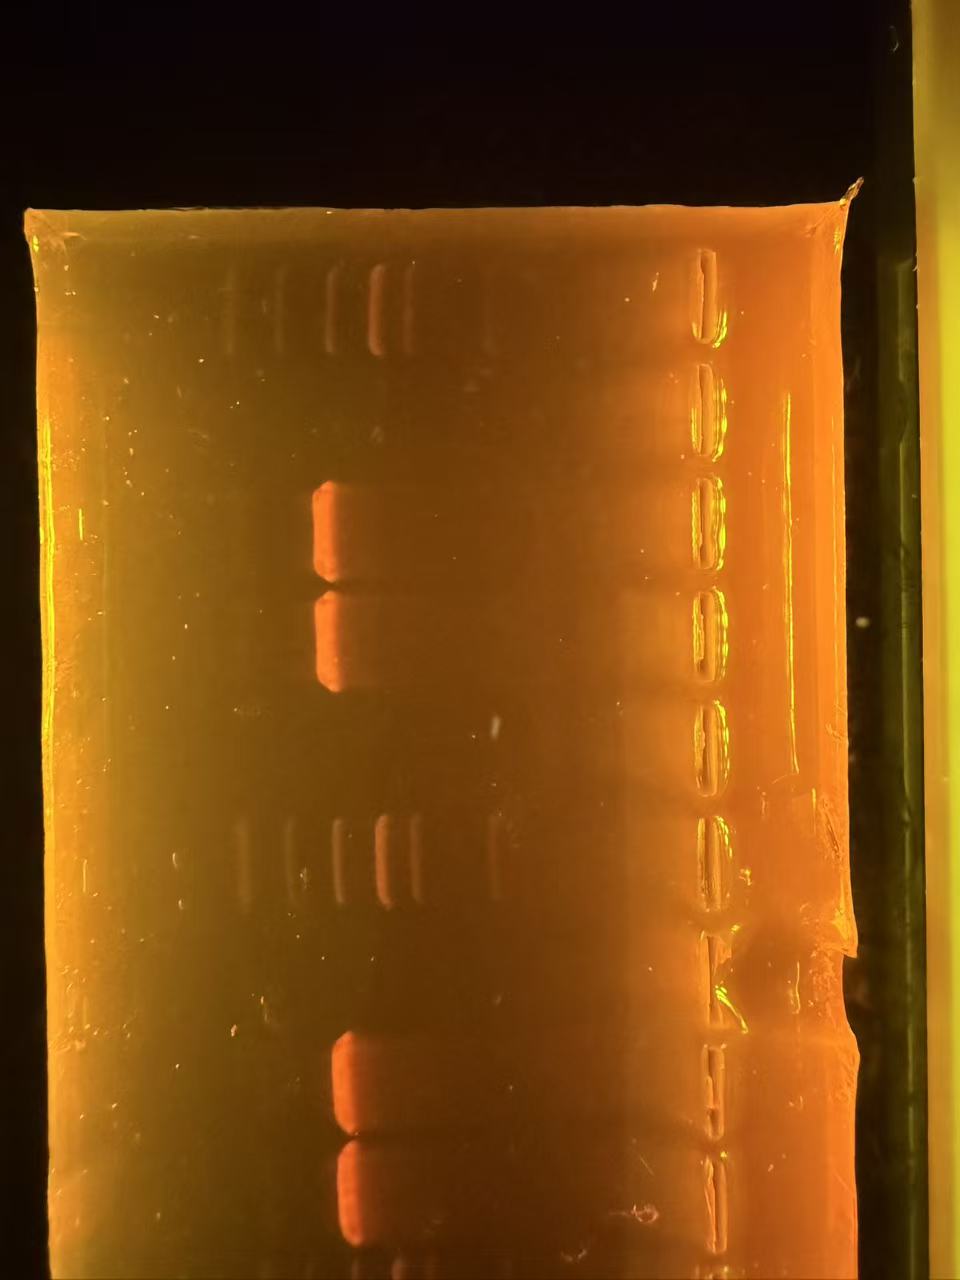

Supplement: Supplementary file 1 [file bdb3ea54303244b35507df4c.docx]
